# Supplementary material for: Polyphenolic Fraction from Olive Mill Wastewater: Scale-Up and in Vitro Studies for Ophthalmic Nutraceutical Applications
Source: PubMed Central journal article supplement (PMC6827079; doi:10.3390/antiox8100462), 2019-10-08
Supplement: antioxidants-08-00462-s001.pdf [file antioxidants-08-00462-s001.pdf]

**Table S1.** Metals analysis of Cerasuola-OMWW and fractions performed by ICP-MS

| <b>Metal (mg/kg)</b>                  | <b>Cerasuola-OMWW</b> | <b>PAD428-FR1</b> | <b>PAD428-FR2</b> |
|---------------------------------------|-----------------------|-------------------|-------------------|
| <b>Sb, Hg, As, Ag, Cd, Se, Bi, Be</b> | < 0.01                | < 0.01            | < 0.01            |
| <b>Mo</b>                             | 0.01                  | 0.01              | < 0.01            |
| <b>Pb</b>                             | 0.03                  | 0.01              | < 0.01            |
| <b>Al</b>                             | 0.30                  | 0.28              | 0.02              |
| <b>Cr</b>                             | 0.02                  | 0.01              | < 0.01            |
| <b>Co</b>                             | 0.02                  | 0.02              | < 0.01            |
| <b>Cu</b>                             | 0.60                  | 0.39              | 0.12              |
| <b>Zn</b>                             | 3.00                  | 2.69              | 0.07              |
| <b>Fe</b>                             | 1.99                  | 1.52              | 0.11              |
| <b>Mn</b>                             | 2.17                  | 1.92              | 0.04              |
| <b>Ni</b>                             | 0.11                  | 0.09              | 0.01              |
| <b>Na</b>                             | 303.34                | 274.74            | 4.10              |
| <b>K</b>                              | 7379.34               | 6850.37           | 6.36              |
| <b>Ca</b>                             | 61.74                 | 51.03             | 2.91              |
| <b>Mg</b>                             | 240.56                | 216.87            | 4.05              |

Method according to Di Mauro et al., (*Food Funct.*, 2017,**8**, 4713-4722)

**Table S2.** Biophenols in Cerasuola-OMWW and PAD428-FR2 performed by HPLC-DAD analysis

| Biophenol (mg/l)              | Cerasuola-OMWW | PAD428-FR2* | PAD428-FR2° |
|-------------------------------|----------------|-------------|-------------|
| Gallic acid                   | -              | -           | -           |
| Pyrocatechol                  | 6.59±0.08      | 5.34±0.07   | 3.26±0.07   |
| <i>p</i> -Hydroxybenzoic acid | -              | -           | -           |
| 4-Hydroxyphenylacetic acid    | traces         | traces      | traces      |
| Caffeic acid                  | 9.12±0.11      | 8.55±0.12   | 5.88±0.08   |
| Floretic acid                 | 21.17±0.21     | 18.23±0.19  | 10.61±0.09  |
| Verbascoside                  | traces         | traces      | traces      |
| <i>p</i> -Coumaric acid       | 4.27±0.13      | 3.28±0.06   | traces      |
| <i>Trans</i> -ferulic         | -              | -           | -           |
| Oleuropein                    | 14.32±0.15     | 12.91±0.12  | 7.32±0.11   |

\* PAD428-FR2 obtained in laboratory; ° PAD428-FR2 obtained by process scale-up.

Mean values (n=9) ± SD were calculated

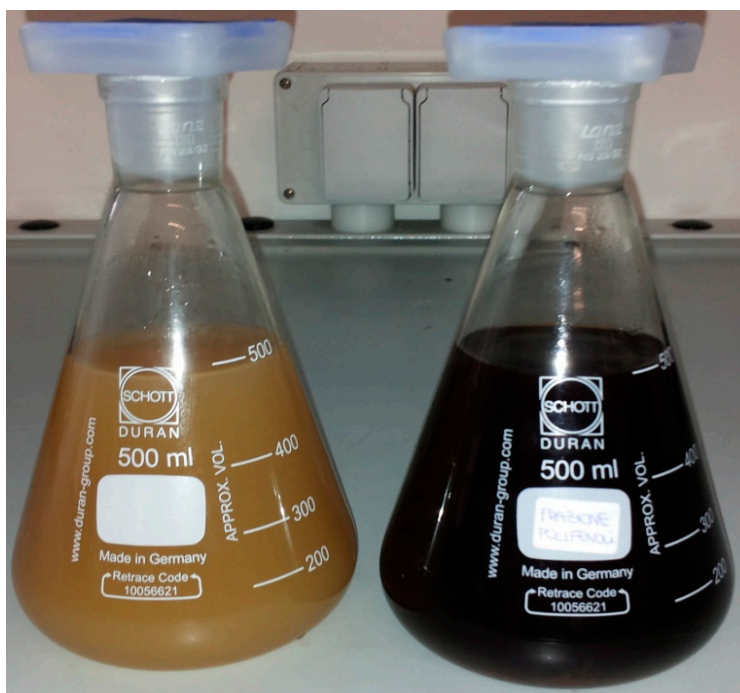

**Figure S1.** Pictures of unabsorbed fraction eluted with water (PAD428-FR1, left) and fraction eluted with water/ethanol (50/50) solution (PAD428-FR2, right).

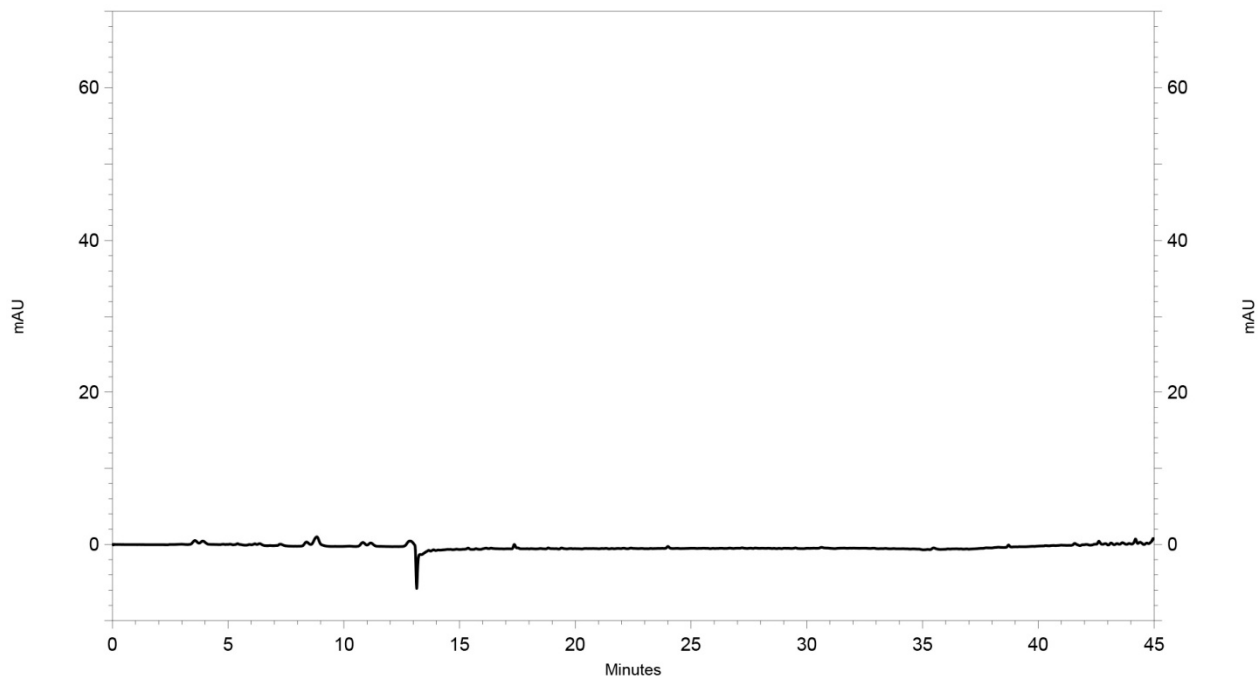

**Figure S2.** Chromatogram of PAD428-FR1 at 280 nm.

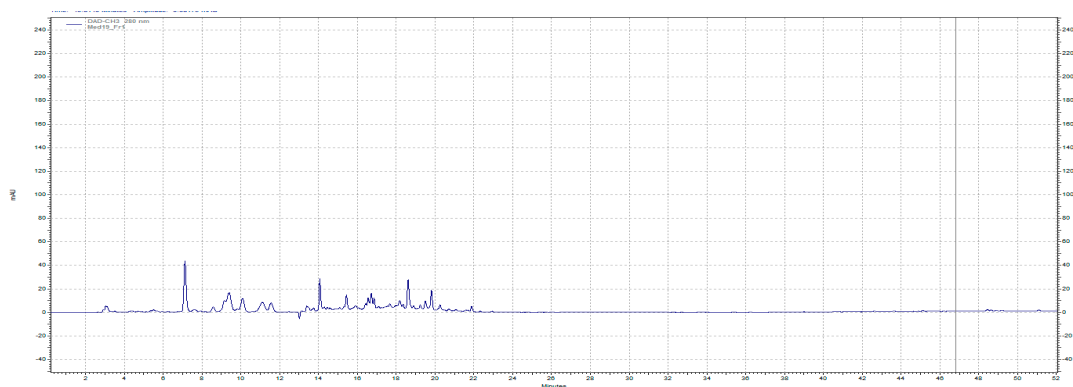

**Figure S3.** Chromatogram of PAD900-FR1 at 280 nm.

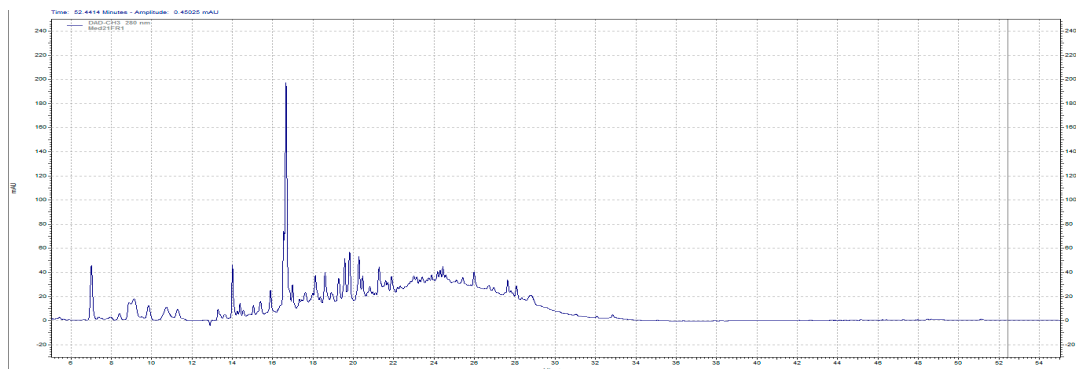

**Figure S4.** Chromatogram of PAD550-FR1 at 280 nm.

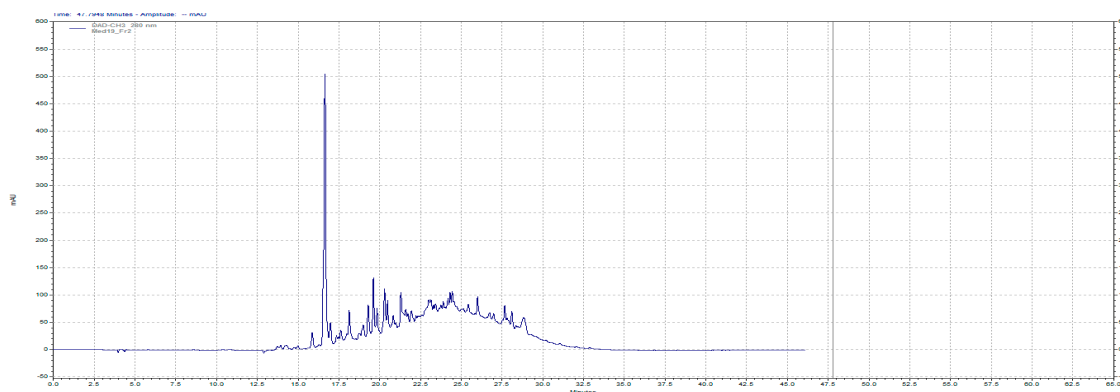

**Figure S5.** Chromatogram of PAD900-FR2 at 280 nm.

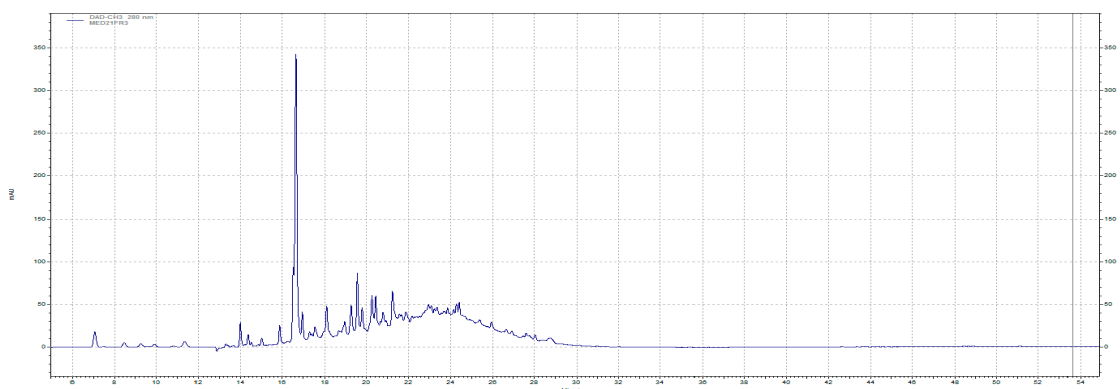

**Figure S6.** Chromatogram of PAD550-FR2 at 280 nm.

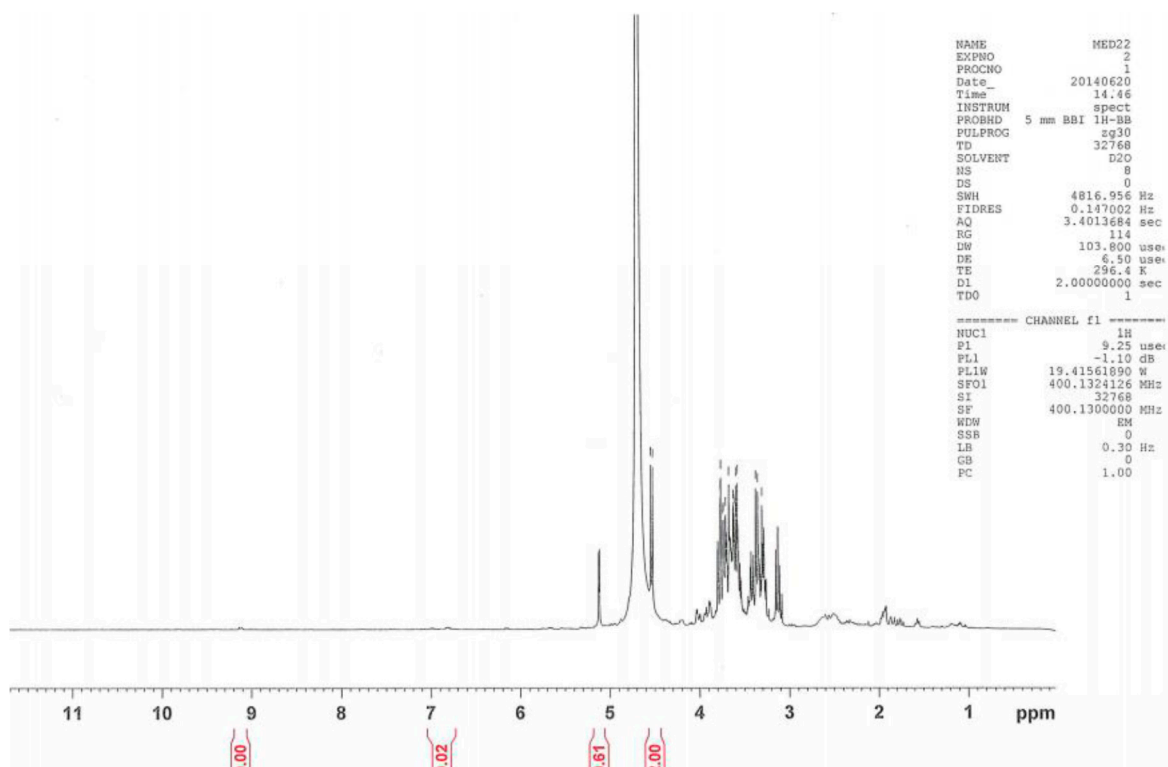

**Figure S7.**  $^1\text{H-NMR}$  spectrum of PAD428-FR1 exhibited only signals in the typical regions of the alkylic (1-2 ppm) and heteroalkylic groups (3-4 ppm), confirming the absence of polyphenols and giving indications about the presence of carbohydrates.

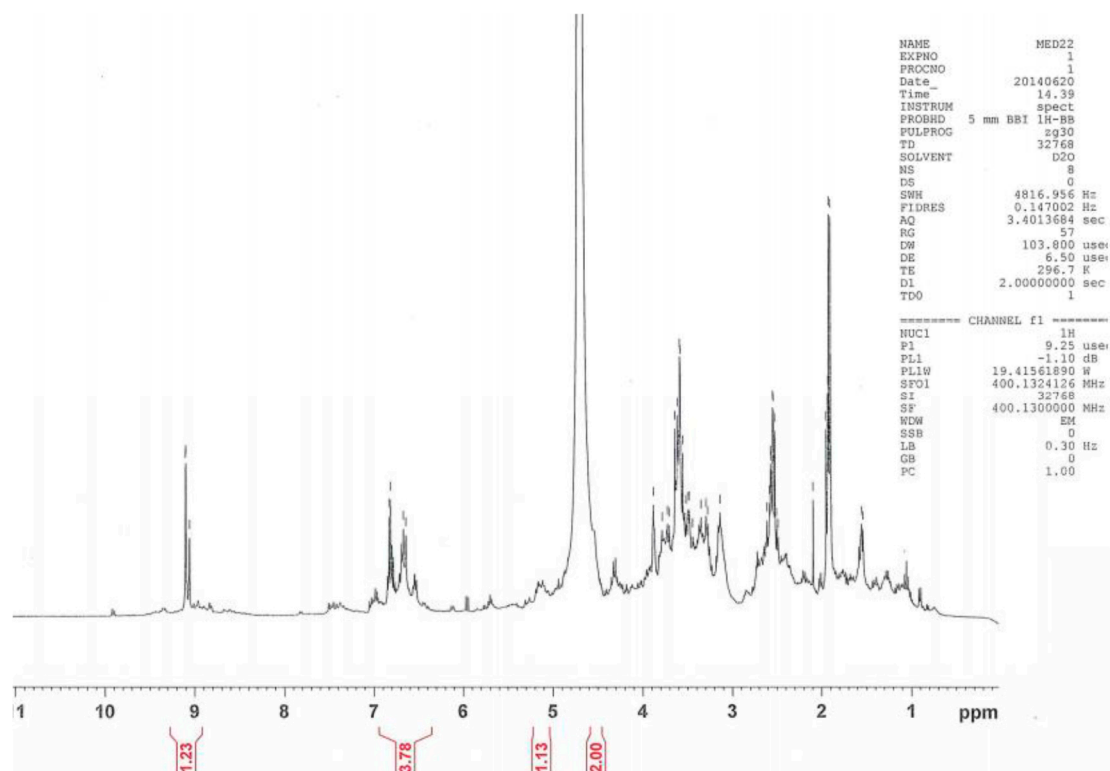

**Figure S8.**  $^1\text{H-NMR}$  spectrum of PAD428-FR2 exhibited the characteristic signals of aromatic compounds (around 6.0-7.5 ppm) confirming the aromatic nature of the compounds in the mixture.

Alkylic (1-2 ppm) and heteroalkylic groups (3-4 ppm) are still present and can be assigned to the sugar moiety of the glycosylated phenols.

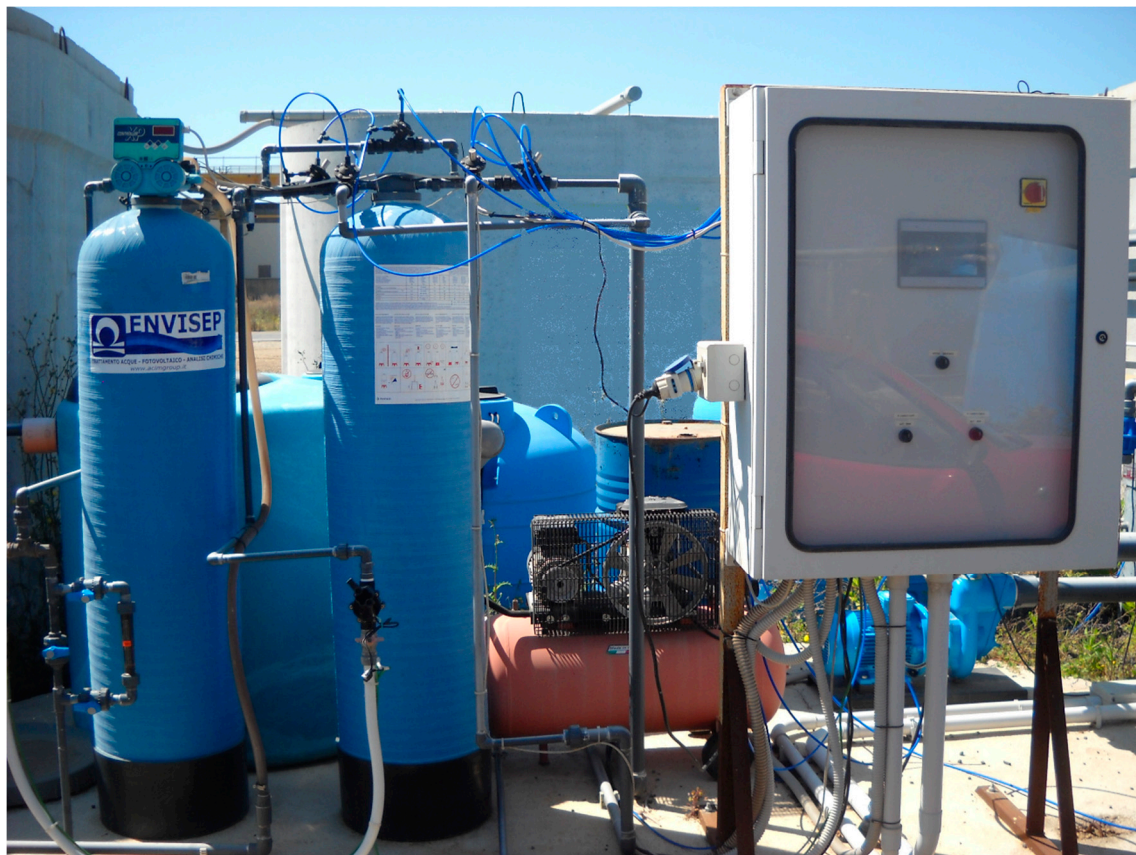

**Figure S9.** Picture of the pilot plant.
